# Supplementary material for: Sox9+ ductal cells are multipotent progenitors throughout development but do not produce new endocrine cells in the normal or injured adult pancreas
Source: Oxford University Press journal article supplement (doi:10.1242/dev.056499), 2011-01-25
Supplement: dev056499-sup-dev56499tables1.pdf [file dev056499-sup-dev56499tables1.pdf]

**Table S1. Quantification of insulin<sup>+</sup> cells in *Sox9CreER<sup>T2</sup>;R26R<sup>YFP</sup>* mice after partial duct ligation (PDL) or sham operation (control)**

|                    | Cluster size (number of insulin <sup>+</sup> cells) |                       |                  |                       |                  |                       |                  |                       |                  |                       |                  |                       |                  |                       | <i>n</i> | Average (per mouse) |                       |
|--------------------|-----------------------------------------------------|-----------------------|------------------|-----------------------|------------------|-----------------------|------------------|-----------------------|------------------|-----------------------|------------------|-----------------------|------------------|-----------------------|----------|---------------------|-----------------------|
|                    | 1-5                                                 |                       | 6-10             |                       | 11-20            |                       | 21-50            |                       | 51-100           |                       | >100             |                       | Total cells      |                       |          | Ins <sup>+</sup>    | YFP+/Ins <sup>+</sup> |
|                    | Ins <sup>+</sup>                                    | YFP+/Ins <sup>+</sup> | Ins <sup>+</sup> | YFP+/Ins <sup>+</sup> | Ins <sup>+</sup> | YFP+/Ins <sup>+</sup> | Ins <sup>+</sup> | YFP+/Ins <sup>+</sup> | Ins <sup>+</sup> | YFP+/Ins <sup>+</sup> | Ins <sup>+</sup> | YFP+/Ins <sup>+</sup> | Ins <sup>+</sup> | YFP+/Ins <sup>+</sup> |          |                     |                       |
| Control            | 670                                                 | 15                    | 633              | 4                     | 967              | 1                     | 2744             | 1                     | 3795             | 3                     | 11237            | 2                     | 20046            | 26                    | 5        | 4009                | 5                     |
| 1 week after PDL   | 622                                                 | 13                    | 662              | 2                     | 927              | 2                     | 2081             | 1                     | 3710             | 1                     | 15486            | 1                     | 23488            | 20                    | 4        | 5872                | 5                     |
| Control            | 321                                                 | 8                     | 283              | 2                     | 653              | 1                     | 1801             | 2                     | 1861             | 1                     | 13086            | 17                    | 18005            | 31                    | 3        | 6002                | 10                    |
| 2 months after PDL | 465                                                 | 12                    | 539              | 5                     | 845              | 4                     | 3036             | 3                     | 3701             | 2                     | 21145            | 16                    | 29731            | 42                    | 3        | 9910                | 14                    |

Ins<sup>+</sup>, number of insulin-positive cells counted.

YFP+/Ins<sup>+</sup>, number of YFP-positive, insulin-positive cells identified.
